# Supplementary material for: Dose–response relationship between cigarette smoking and site-specific cancer risk: protocol for a systematic review with an original design combining umbrella and traditional reviews
Source: PubMed Central journal article supplement — BMJ Open. 2017 Nov 1;7(10):e018930. doi: 10.1136/bmjopen-2017-018930 (PMC5695313; doi:10.1136/bmjopen-2017-018930), 2017-11-01
Supplement: bmjopen-2017-018930.draft_revisions.pdf [file bmjopen-2017-018930.draft_revisions.pdf]

# BMJ Open

BMJ Open is committed to open peer review. As part of this commitment we make the peer review history of every article we publish publicly available.

When an article is published we post the peer reviewers' comments and the authors' responses online. We also post the versions of the paper that were used during peer review. These are the versions that the peer review comments apply to.

The versions of the paper that follow are the versions that were submitted during the peer review process. They are not the versions of record or the final published versions. They should not be cited or distributed as the published version of this manuscript.

BMJ Open is an open access journal and the full, final, typeset and author-corrected version of record of the manuscript is available on our site with no access controls, subscription charges or pay-per-view fees (<http://bmjopen.bmj.com>).

If you have any questions on BMJ Open's open peer review process please email [editorial.bmjopen@bmj.com](mailto:editorial.bmjopen@bmj.com)

# BMJ Open

## Dose-response relationship between cigarette smoking and site-specific cancer risk: protocol for a systematic review with an original design combining umbrella and traditional reviews

|                                 |                                                                                                                                                                                                                                                                                                                                                                                                                                                                                                                                                                                                                                                                                                                  |
|---------------------------------|------------------------------------------------------------------------------------------------------------------------------------------------------------------------------------------------------------------------------------------------------------------------------------------------------------------------------------------------------------------------------------------------------------------------------------------------------------------------------------------------------------------------------------------------------------------------------------------------------------------------------------------------------------------------------------------------------------------|
| Journal:                        | <i>BMJ Open</i>                                                                                                                                                                                                                                                                                                                                                                                                                                                                                                                                                                                                                                                                                                  |
| Manuscript ID                   | bmjopen-2017-018930                                                                                                                                                                                                                                                                                                                                                                                                                                                                                                                                                                                                                                                                                              |
| Article Type:                   | Protocol                                                                                                                                                                                                                                                                                                                                                                                                                                                                                                                                                                                                                                                                                                         |
| Date Submitted by the Author:   | 01-Aug-2017                                                                                                                                                                                                                                                                                                                                                                                                                                                                                                                                                                                                                                                                                                      |
| Complete List of Authors:       | Lugo, Alessandra; IRCCS – Istituto di Ricerche Farmacologiche “Mario Negri”, Milan, Italy, Department of Environmental Health Sciences<br>Bosetti, Cristina; Istituto di Ricerche Farmacologiche “Mario Negri”, Department of Oncology<br>Peveri, Giulia; IRCCS – Istituto di Ricerche Farmacologiche “Mario Negri”, Department of Environmental Health Sciences<br>Rota, Matteo; Università degli Studi di Milano, Department of Biomedical and Clinical Sciences<br>Bagnardi, Vincenzo; Università degli Studi di Milano-Bicocca, Department of Statistics and Quantitative Methods<br>Gallus, Silvano; IRCCS – Istituto di Ricerche Farmacologiche “Mario Negri”, Department of Environmental Health Sciences |
| <b>Primary Subject Heading</b>: | Smoking and tobacco                                                                                                                                                                                                                                                                                                                                                                                                                                                                                                                                                                                                                                                                                              |
| Secondary Subject Heading:      | Epidemiology, Oncology, Public health, Research methods                                                                                                                                                                                                                                                                                                                                                                                                                                                                                                                                                                                                                                                          |
| Keywords:                       | Cancer, Risk, Cigarette smoking, Dose-response relationship, Systematic review, Meta-analysis                                                                                                                                                                                                                                                                                                                                                                                                                                                                                                                                                                                                                    |
|                                 |                                                                                                                                                                                                                                                                                                                                                                                                                                                                                                                                                                                                                                                                                                                  |

SCHOLARONE™  
Manuscripts

1  
2  
3 **Dose-response relationship between cigarette smoking and site-specific cancer risk: protocol**  
4  
5 **for a systematic review with an original design combining umbrella and traditional reviews**  
6  
7

8  
9 Alessandra LUGO<sup>1</sup>, Cristina BOSETTI<sup>2</sup>, Giulia PEVERI<sup>1</sup>,  
10  
11 Matteo ROTA<sup>3</sup>, Vincenzo BAGNARDI<sup>4</sup>, Silvano GALLUS<sup>1</sup>  
12  
13

14  
15  
16 <sup>1</sup> Department of Environmental Health Sciences, IRCCS – Istituto di Ricerche Farmacologiche  
17  
18 “Mario Negri”, Milan, Italy  
19

20  
21 <sup>2</sup> Department of Oncology, IRCCS – Istituto di Ricerche Farmacologiche “Mario Negri”, Milan,  
22  
23 Italy  
24

25  
26 <sup>3</sup> Department of Biomedical and Clinical Sciences, Università degli Studi di Milano, Milan, Italy  
27

28  
29 <sup>4</sup> Department of Statistics and Quantitative Methods, Università degli Studi di Milano-Bicocca,  
30  
31 Milan, Italy  
32  
33  
34  
35

36 **Corresponding author**

37  
38 Alessandra Lugo, PhD

39  
40 Department of Environmental Health Sciences, Laboratory of Lifestyle Epidemiology,

41  
42 IRCCS – Istituto di Ricerche Farmacologiche “Mario Negri”, Milan, Italy  
43

44  
45 Via G. La Masa 19, 20156 Milan, Italy  
46

47  
48 tel: +390239014653 – fax: +390233200231  
49

50  
51 e-mail: [alessandra.lugo@marionegri.it](mailto:alessandra.lugo@marionegri.it)  
52  
53

54 **Word count:** 2838  
55  
56  
57  
58  
59  
60

## ABSTRACT

**Introduction.** Only a limited number of meta-analyses providing risk curve functions of dose-response relationships between various smoking variables and cancer-specific risk are available.

**Methods and analysis.** To identify all relevant original publications on the issue, we will conduct a series of comprehensive systematic reviews based on three subsequent literature searches: 1) an umbrella review, to identify published meta-analyses, pooled-analyses, and systematic reviews on the association between cigarette smoking and cancer risk; 2) for each cancer site, an updated systematic review of original publications on the association between cigarette smoking and site-specific cancer risk, starting from the last available comprehensive review identified through the umbrella review; 3) a review of all original articles on the association between cigarette smoking and site-specific cancer risk included in the publications identified through the umbrella review or through the update of the reviews. The primary outcomes of interest will be: i) the excess incidence/mortality of various cancers for smokers compared to never smokers; ii) the dose-response curves describing the association between smoking intensity, duration, and time since stopping and incidence/mortality for various cancers. For each cancer site, we will perform a meta-analysis by pooling all the study-specific estimates for smoking status. We will also estimate the dose-response curves for other smoking variables through random-effects meta-regression models based on a nonlinear dose-response relationship framework.

**Ethics and dissemination.** Ethics approval is not required for this study. The main results of this study will be published in peer-reviewed journals and will also be included in a publicly available website. We will provide therefore the most complete and updated estimates on the association between various measures of cigarette smoking and site-specific cancer risk. This will allow us to obtain precise estimates on the cancer burden attributable to cigarette smoking.

**Systematic review registration.** This protocol was registered in PROSPERO (CRD42017063991).

1  
2  
3  
4  
5  
6  
7  
8  
9  
10  
11  
12  
13  
14  
15  
16  
17  
18  
19  
20  
21  
22  
23  
24  
25  
26  
27  
28  
29  
30  
31  
32  
33  
34  
35  
36  
37  
38  
39  
40  
41  
42  
43  
44  
45  
46  
47  
48  
49  
50  
51  
52  
53  
54  
55  
56  
57  
58  
59  
60

**Keywords:** cancer; risk; cigarette smoking; dose-response relationship; systematic review; meta-analysis.

For peer review only

## STRENGTHS AND LIMITATIONS OF THE STUDY

- We will use an original and innovative approach combining an umbrella review and traditional systematic reviews.
- Although we will not conduct a systematic review of the entire scientific literature on the issue, our study is highly feasible, since we consider published reviews.
- We will carry out dose-response analyses using two-steps random-effects meta-regression models in order to examine potential nonlinear relationships between smoking-related variables and the risk of cancer.
- We will provide the most complete and updated estimates on the association between cigarette smoking and site-specific cancer risk.

## INTRODUCTION

In 1950, Ernst Wynder and Evards Graham<sup>1</sup> and Richard Doll and Bradford Hill<sup>2</sup> first reported an association between tobacco smoking and lung cancer risk. Over the subsequent 65 years, thousands of studies systematically confirmed this association and found that tobacco smoking also increases the risk of several other neoplasms.<sup>3</sup> In 2004, tobacco smoking has been classified as carcinogenic to humans (Group 1) by the International Agency for Research on Cancer (IARC)<sup>3</sup>, which provided evidence on the causal relationship between cigarette smoking and cancer of the lung, oral cavity, nasal cavity and paranasal sinuses, nasopharynx, oropharynx, hypopharynx, larynx, oesophagus, stomach, pancreas, liver, kidney, ureter, urinary bladder, cervix and myeloid leukaemia<sup>3</sup>. The results on the association between (cigarette) smoking and other cancer sites, including cancers of the breast and endometrium, remain conflicting.<sup>3</sup>

Since late 1980s, publications reporting results from systematic reviews and meta-analyses, the large majority of which were unnecessary and misleading, rapidly increased.<sup>4</sup> Although the effects of cigarette smoking on cancer incidence and/or mortality have been largely investigated, only a limited number of systematic reviews/meta-analyses are available on the quantification of the dose-response relationship between selected smoking variables, including smoking intensity, duration, pack-years and time since quitting, and the risk of cancer. More importantly, just a few meta-analyses, if any, provided the cancer-specific risk curve functions of the dose-response relationships. Dose-response data, however, are crucial to provide reliable and accurate estimates of the cancer burden due to smoking, both at individual - absolute cancer incidence/mortality obtained through lung cancer risk-assessment models and risk charts<sup>5 6</sup> - and population level - smoking attributable deaths.<sup>7 8</sup> Currently, the methods developed to quantify the cancer burden due to smoking use cancer-specific estimates of relative risks (RR) according to tobacco smoking derived from a few large cohorts, mainly from the USA.<sup>9</sup> The use of these cohorts to derive RRs may lead to validity problems when applying these estimates to other populations with different smoking patterns.<sup>7 10</sup> Furthermore, these RRs are often estimated after allowance for a limited number of

1  
2  
3 socio-demographic characteristics, excluding potentially important confounding variables, such as  
4  
5 alcohol drinking.  
6

7 Using an original and innovative approach, which combines an umbrella review and traditional  
8  
9 systematic reviews, we aim at providing a comprehensive and updated picture of the association  
10  
11 between various smoking-related variables and site-specific cancer risk. We will be able to estimate  
12  
13 the most robust cancer-specific RRs, obtained from the existing scientific literature, possibly  
14  
15 derived after adjustment for relevant covariates. Moreover, for each cancer site, we will be able to  
16  
17 provide the risk curves which best describe the dose-response effect of smoking intensity, smoking  
18  
19 duration, pack-years, and time since stopping smoking on cancer risk.  
20  
21  
22  
23  
24  
25  
26

## 27 **METHODS**

28  
29 The present cancer-specific systematic reviews/meta-analyses will be based on the following three  
30  
31 subsequent literature searches on the association between cigarette smoking and cancer risk:  
32  
33

- 34 1. Umbrella review: a systematic review to identify published meta-analyses, pooled-analyses, and  
35  
36 systematic reviews providing data on the association between cigarette smoking and cancer risk;  
37
- 38 2. Update of available cancer-specific reviews: for each cancer site, the conduction of a systematic  
39  
40 review of studies providing original data (including pooled-analyses on individual participants data)  
41  
42 on the association between cigarette smoking and cancer-specific risk, starting from the last  
43  
44 available comprehensive review publication identified through the umbrella review (point 1);  
45  
46
- 47 3. Review of all original publications: a review of all original articles on the association between  
48  
49 cigarette smoking and site-specific cancer risk included in the cancer-specific review publications  
50  
51 identified through the umbrella review (point 1) or identified through the update of the available  
52  
53 reviews (point 2).  
54  
55

56 The design of the present systematic reviews was developed following the Preferred Reporting  
57  
58 Items for Systematic review and Meta-Analyses (PRISMA) guidelines<sup>11</sup> and its extension for  
59  
60



1  
2  
3 protocols (PRISMA-P).<sup>12 13</sup> This protocol was registered in the International Prospective Register of  
4  
5 Systematic Reviews (PROSPERO) on 4 May 2017 (registration number: CRD42017063991).  
6  
7  
8  
9  
10

## 11 **1. Umbrella review**

### 12 ***Search strategy***

13  
14  
15 We will conduct a systematic literature search to identify all published meta-analyses, pooled-  
16  
17 analyses, and systematic reviews providing data on the association between cigarette smoking and  
18  
19 the risk of various cancers. Literature search strategy will include combinations of Medical Subjects  
20  
21 Headings (MeSH) and text words related to *cancer* and *tobacco* or *smoking*, and will be restricted to  
22  
23 the following publication types: meta-analyses, pooled-analyses, and systematic reviews. No  
24  
25 restriction on cancer site or on publication date will be applied. The following databases will be  
26  
27 used: MEDLINE, Embase, ISI Web of Science (WoS), and Cochrane Database of Systematic  
28  
29 Reviews (CDSR). The search strings to be used in various databases are reported in **Appendix 1**.  
30  
31 To ensure literature saturation, reference lists of selected relevant publications identified through  
32  
33 the search will also be checked. Besides the publications found through the databases searches, we  
34  
35 will also consider the reviews of the literature on tobacco smoking provided within the IARC  
36  
37 monographs vol. 83<sup>3</sup> and vol. 100E<sup>14</sup> and the Surgeon General Report<sup>15</sup>, three reports of known  
38  
39 importance providing data on the association between tobacco smoking and various cancer sites.  
40  
41  
42  
43  
44  
45  
46

### 47 ***Eligibility criteria***

#### 48 ***Study design***

49  
50 We will include meta-analyses, pooled-analyses and systematic reviews of observational studies  
51  
52 providing measures of RRs between cigarette smoking and cancer risk. Original observational  
53  
54 studies (e.g., case-control, cohort or cross-sectional studies) will be excluded. Reports, letters to the  
55  
56 editor, book chapters, conference proceedings, dissertations, and theses will be not considered.  
57  
58  
59  
60

### *Conditions*

We will consider publications providing data on the following 28 (namely all) malignant neoplasms: cancer of lip, oral cavity and pharynx (ICD-10: C00-C14), nasopharynx (C11), oesophagus (C15), stomach (C16), colon (C18), rectum and anus (C19-C21), liver (C22), gallbladder (C23-C24), pancreas (C25), larynx (C32), lung trachea and bronchus (C33-C34), bone (C40-C41), melanoma of skin (C43), mesothelioma (C45), breast (C50), cervix uteri (C53), corpus uteri (C54), ovary (C56), prostate (C61), testis (C62), kidney (C64), bladder (C67), brain, central nervous system (C70-C72), thyroid (C73), Hodgkin lymphoma (C81), non-Hodgkin lymphoma (C82-C86, C96), multiple myeloma (C88-C90) and leukaemia (C91-C95). We will also consider review publications on groups of cancers (e.g., head and neck, upper aero-digestive tract, or intestinal cancers). Studies specifically based on benign neoplasms, such as colorectal polyps, acoustic neuroma and meningioma, and neuroendocrine tumours will be excluded.

### *Participants*

We will include review publications providing data on humans, in the general population. We will therefore exclude review publications based on patients with cancer or other diseases (i.e., reporting data on the effect of smoking on the prognosis of the disease), or on subgroups of the population with selected lifestyle habits or other characteristics (e.g., populations limited to alcohol drinkers or tobacco smokers). No restriction will be applied according to age of participants at cancer incidence or mortality given that practically all studies providing data on the association between cigarette smoking and cancer risk are based on adults, only.

### *Exposures*

We will include all review publications providing data on the use of cigarettes in the general population. Publications focused on the use of tobacco products other than cigarettes (e.g., pipe, smokeless tobacco, cigar, water pipe, electronic cigarettes) or on the exposure to second-hand smoke will be excluded.

### *Outcomes*

The primary outcomes of interest will be: i) the excess incidence and/or mortality of various cancers in current/ever smokers compared to non/never smokers; ii) the dose-response curves describing the association between cigarette smoking duration, intensity and time since stopping and incidence and/or mortality for various cancers.

### *Languages*

We will include only articles published in English language.

### *Study selection*

All the review publications found in various electronic databases through the above mentioned search strategy will be uploaded in an EndNote library (EN1), and duplicate records will be deleted. Titles and/or abstracts of the meta-analyses, pooled-analyses and systematic reviews will be screened independently by two reviewers (AL, GP) to exclude publications which will not meet the eligibility criteria. The full text of the remaining review publications will be retrieved and independently assessed for eligibility by the two reviewers. Discrepancies between the two reviewers will be discussed and solved. In case of disagreement, a third reviewer (SG) will help to find a final decision. Data from other available reports will also be integrated in the same EN1 library.

### *Quality assessment*

Assessment of the quality of various review publications is out of the scope of the present systematic review. Thus, no quality score will be assigned to the publications. No review publication will be excluded *a priori* for weakness of design or data quality.

### *Data extraction and management*

1  
2  
3 A standardised form in Microsoft (MS) Excel will be used to extract data from each identified  
4 review publication. Relevant information will include: first author, year of publication, type of  
5 study (i.e., meta-analysis, pooled-analysis, or systematic review), cancer site(s) and/or subsite(s),  
6 endpoint (i.e., incidence and/or mortality), and other information about the methodology of studies  
7 included in the reviews (e.g., study design, country(ies) of study conduction, number of studies  
8 considered in, and overall population size). Data will be extracted from each included meta-  
9 analysis, pooled analysis or systematic review by one reviewer and verified by a second reviewer.  
10 Any disagreement between the two reviewers will be solved by consensus. Otherwise, a third  
11 reviewer will help to find a final decision. After data extraction, publications will be grouped  
12 according to the considered cancer site.  
13  
14  
15  
16  
17  
18  
19  
20  
21  
22  
23  
24  
25  
26

### 27 *Preliminary umbrella review*

28  
29 We already conducted a preliminary umbrella review through which we identified the meta-  
30 analyses, pooled-analyses and systematic reviews on the association between smoking and cancer  
31 risk published before 28<sup>th</sup> April 2017. Within the comprehensive literature search, we found a total  
32 of 1430 publications from the four considered databases (726 from Medline, 316 from Embase, 376  
33 from ISI WoS, and 12 from CDSR; **Figure 1**). After the exclusion of duplicates (n=542) and  
34 ineligible papers (n=716), and after the inclusion of three important reports<sup>3 14 15</sup>, we obtained a total  
35 of 175 relevant publications (i.e., 107 meta-analyses, 52 pooled-analyses, and 16 systematic  
36 reviews) on the association between smoking and risk of various neoplasms.  
37  
38  
39  
40  
41  
42  
43  
44  
45  
46  
47  
48  
49  
50  
51

## 52 **2. Update of the available cancer-specific reviews**

### 53 *Search strategy*

54  
55 For each of the 28 cancer sites previously described in the umbrella review, we will identify the last  
56 available comprehensive systematic review or meta-analysis on the association with cigarette  
57  
58  
59  
60

1  
2  
3 smoking. We will then update the identified cancer-specific review through the conduction of a  
4 systematic literature search on all observational studies (e.g., case-control, cohort, and nested case-  
5 control studies) providing original data on the association between cigarette smoking and site-  
6 specific cancer risk, and published after the year of publication of the most recent article included in  
7 the last comprehensive review. Only studies published in English language will be considered.  
8  
9

10  
11 The literature search strategy will be conducted in MEDLINE and Embase, and will include  
12 combinations of MeSH terms and text words related to *site-specific cancer* and *tobacco* or *smoking*  
13 (Appendix 2).  
14  
15  
16  
17  
18  
19

## 20 21 22 ***Eligibility criteria***

### 23 ***Study design***

24  
25 We will include original observational studies (e.g., case-control, cohort, nested case-control  
26 studies, or pooled-analysis of individual participant data) providing measures of RRs of the  
27 association between cigarette smoking and site-specific cancer risk. Reports, book chapters,  
28 conference proceedings, dissertations, and theses will not be considered. We will exclude case-  
29 control studies using patients with cancer or other chronic diseases as comparison group.  
30  
31  
32  
33  
34  
35  
36  
37

### 38 ***Comparator***

39  
40 Never smokers are our comparators. We will in fact consider, as the measure of association, the  
41 RRs of smoking variables compared to never smokers.  
42  
43  
44

45 Eligibility criteria for *conditions*, *participants*, *exposures*, and *outcomes* are those reported also for  
46 the umbrella review.  
47  
48  
49

### 50 51 ***Study selection***

52  
53 For each cancer site, we will upload all the original publications found using the above mentioned  
54 search strategy in cancer-specific EndNote libraries (EN2\_1-EN2\_28) and we will delete the  
55 identified duplicates. Titles and/or abstracts of original articles will be screened independently by  
56  
57  
58  
59  
60

1  
2  
3 two reviewers (AL, GP) to exclude publications that do not meet the inclusion criteria outlined  
4 above. The full text of the remaining original publication will be retrieved and independently  
5 assessed for eligibility by the two reviewers. Discrepancies on the assessment between the two  
6 reviewers will be discussed and solved. In case of disagreement, a third reviewer (SG) will help to  
7 find a final decision. Being out of the scope of the present systematic review, no quality assessment  
8 will be considered. No original publication will be excluded *a priori* for weakness of design or data  
9 quality.  
10  
11  
12  
13  
14  
15  
16  
17  
18  
19  
20  
21  
22

### 23 **3. Review of all original publications**

24 For each cancer site, we will upload in an EndNote library (EN3\_1-EN3\_28) all the original  
25 publications obtained from the 28 cancer-specific reviews identified in the umbrella review (point  
26 1). In the same EndNote libraries, we will add the original publications obtained from the  
27 corresponding updates of the reviews (point 2), and duplicate publications will be deleted. The full  
28 text of all the retained original publications will be retrieved. Non-English reports, unpublished  
29 studies, conference proceedings, dissertations and theses will be excluded.  
30  
31  
32  
33  
34  
35  
36  
37

38 **Figure 2** shows the flowchart we will consider for each of the 28 cancer-specific reviews. For each  
39 cancer site, original publications from both the umbrella review and the update of the reviews will  
40 be considered.  
41  
42  
43  
44  
45  
46

#### 47 ***Data extraction and management***

48 For each cancer site, two standardised forms in MS Excel will be used to collect relevant  
49 information on the study design and the risk estimates from the original publications. A first form  
50 will be used to extract data related to the study design including: first author, year of publication,  
51 journal, country, study name, period and design of study, outcome and sample size. In the second  
52 form we will collect the exposure categories (i.e., smoking status, intensity, duration, pack-years,  
53  
54  
55  
56  
57  
58  
59  
60

1  
2  
3 age at starting, time since stopping), and corresponding RR estimates (or other estimates, such as  
4 odds ratios and hazard ratios) and 95% confidence intervals (CIs). The number of cases in each  
5 exposure category and covariates used in the model will be also collected. When the results of the  
6 same study have been published in more than one original publication, only data from the most  
7 recent and/or complete article will be retained and reported in the second Excel form.  
8  
9  
10  
11  
12

### 13 14 15 16 *Data analysis*

17  
18 For each cancer site, we will pool all the RRs or other risk estimates (e.g., hazard ratios and odds  
19 ratios) for current, former or ever compared to never smokers. Because cancer is a relatively rare  
20 outcome, we assume that ORs, risk ratios and rate ratios are all comparable estimates of the RR.  
21 Heterogeneity between studies will be assessed using the Cochran Q test and the I-squared  
22 statistics, i.e. the proportion of total variation contributed by between-study heterogeneity.<sup>16</sup> As we  
23 anticipated between study heterogeneity, we will present pooled RRs from random-effects models  
24 using the DerSimonian and Laird moment estimator of the between-study variance component.<sup>17</sup>  
25 However, if no heterogeneity between-study is detected, pooled estimates from the random-effects  
26 model will correspond to those deriving from the fixed-effect model.  
27  
28  
29  
30  
31  
32  
33  
34  
35  
36  
37

38 When RRs are reported separately for current and former compared to never smokers, we will  
39 combine them into a single estimate for ever smokers using the method for pooling non-  
40 independent estimates described by Hamling et al.<sup>18</sup> This method uses the number of subjects  
41 exposed to different levels of smoking and non-exposed subjects, and the corresponding risk  
42 estimates, to derive a set of pseudo-numbers of cases and controls/subjects at risk, by taking into  
43 account the correlation between the original estimates due to the common reference group. The  
44 obtained pseudo-numbers will be used to compute the new adjusted RR. This methodology will also  
45 be used to convert RR estimates when the reference category considered in the study is not  
46 represented by never smokers.  
47  
48  
49  
50  
51  
52  
53  
54  
55  
56  
57  
58  
59  
60

1  
2  
3 For smoking intensity, duration and time since stopping smoking, we will compute pooled RRs  
4 according to various categories of the considered smoking-related variables (e.g, low, intermediate,  
5 high cigarette consumption). Moreover, we will carry out dose-response analyses using two-steps  
6 random-effects meta-regression models in order to examine potential nonlinear relationships  
7 between those variables and the risk of cancer. In particular, we will consider a method providing  
8 the best fitting two-term fractional polynomial model<sup>19</sup>, and a method modelling the considered  
9 smoking-related variables using restricted cubic splines.<sup>20</sup>

10  
11  
12 If the necessary data are available, we will consider to further conduct separate analyses by sex,  
13 study period, geographic area, and income (defined on the basis of per-capita Gross Domestic  
14 Product).

15  
16  
17 Analyses will be conducted using SAS software version 9.4 (SAS Institute Inc., Cary, NC, USA),  
18 and R software version 3.3.0 (R Development Core Team, 2008), in particular *meta* and *dosresmeta*  
19 packages.

## 20 21 22 23 24 25 26 27 28 29 30 31 32 33 34 35 36 **ETHICS AND DISSEMINATION**

### 37 38 ***Ethics***

39  
40 This review does not require approval from an ethics committee, since no individual-level patients'  
41 data will be collected.

### 42 43 44 45 46 47 ***Implications and dissemination***

48  
49 Through these systematic reviews and meta-analyses, we will provide the most complete and  
50 updated estimates on the association between cigarette smoking and site-specific cancer risk. These  
51 estimates will be used to quantify the cancer burden due to cigarette smoking at both individual and  
52 population level. This information is essential to guide policy decisions to control tobacco smoking  
53 and improve cancer prevention.



1  
2  
3 Given the relevance and originality of this project, we plan to publish results from the meta-  
4 analyses in peer-reviewed journals, considering either single cancer sites or various apparatus or  
5 tracts. A final publication will provide the summary results for all cancers. We will also include the  
6 main results of our systematic reviews and meta-analyses in a publicly available website. Readers  
7 will have the possibility to contact us to communicate possible lacks or updates.  
8  
9  
10  
11  
12  
13  
14  
15  
16  
17  
18  
19  
20  
21  
22  
23  
24  
25  
26  
27  
28  
29  
30  
31  
32  
33  
34  
35  
36  
37  
38  
39  
40  
41  
42  
43  
44  
45  
46  
47  
48  
49  
50  
51  
52  
53  
54  
55  
56  
57  
58  
59  
60

For peer review only

### Contributions

SG and AL had the original idea of the work. AL, GP, and SG structured the study protocol, designed the search strategies, and conducted the umbrella review. MR, VB, and CB provided statistical and epidemiological supervision. All authors critically revised the draft of the manuscript and approved its final version.

### Funding

This work was partially supported by the Italian League Against Cancer (Milan). AL was supported by a fellowship from the Italian Association for Cancer Research (AIRC). MR was supported by a fellowship from the Italian Foundation for Cancer Research (FIRC).

### Competing interests

None declared.

## REFERENCES

1. Wynder EL, Graham EA. Tobacco smoking as a possible etiologic factor in bronchiogenic carcinoma; a study of 684 proved cases. *J Am Med Assoc* 1950;143(4):329-36.
2. Doll R, Hill AB. Smoking and carcinoma of the lung; preliminary report. *Br Med J* 1950;2(4682):739-48.
3. IARC. IARC Monographs on the Evaluation of Carcinogenic Risks to Humans. Volume 83. Tobacco Smoke and Involuntary Smoking. Lyon, France: International Agency for Research on Cancer 2004.
4. Ioannidis JP. The Mass Production of Redundant, Misleading, and Conflicted Systematic Reviews and Meta-analyses. *Milbank Q* 2016;94(3):485-514.
5. Spitz MR, Hong WK, Amos CI, *et al.* A risk model for prediction of lung cancer. *J Natl Cancer Inst* 2007;99(9):715-26.
6. Tammemagi MC, Katki HA, Hocking WG, *et al.* Selection criteria for lung-cancer screening. *N Engl J Med* 2013;368(8):728-36.
7. Perez-Rios M, Montes A. Methodologies used to estimate tobacco-attributable mortality: a review. *BMC Public Health* 2008;8:22.
8. Tachfouti N, Raheison C, Obtel M, *et al.* Mortality attributable to tobacco: review of different methods. *Arch Public Health* 2014;72(1):22.
9. ACS. Cancer Prevention Study II (CPS II). Available at: <http://www.cancer.org/research/researchtopreventcancer/currentcancerpreventionstudies/cancer-prevention-study> 2016
10. Gallus S, Muttarak R, Martinez-Sanchez JM, *et al.* Smoking prevalence and smoking attributable mortality in Italy, 2010. *Prev Med* 2011;52(6):434-8.
11. Moher D, Liberati A, Tetzlaff J, *et al.* Preferred reporting items for systematic reviews and meta-analyses: the PRISMA statement. *BMJ* 2009;339:b2535.
12. Moher D, Shamseer L, Clarke M, *et al.* Preferred reporting items for systematic review and meta-analysis protocols (PRISMA-P) 2015 statement. *Syst Rev* 2015;4:1.
13. Shamseer L, Moher D, Clarke M, *et al.* Preferred reporting items for systematic review and meta-analysis protocols (PRISMA-P) 2015: elaboration and explanation. *BMJ* 2015;349:g7647.
14. IARC. IARC monograph on the evaluation of carcinogenic risks to humans. Volume 100E. A review of human carcinogens - Personal habits and indoor combustions. Available at: <http://monographs.iarc.fr/ENG/Monographs/vol100E/mono100E.pdf>. Lyon, France 2012.

- 1  
2  
3 15. U.S. Department of Health and Human Services. The Health Consequences of Smoking - 50  
4 Years of Progress A Report of the Surgeon General. Available at:  
5 <https://www.surgeongeneral.gov/library/reports/50-years-of-progress/full-report.pdf>. Atlanta,  
6 GA 2014.  
7
- 8  
9 16. Higgins JP, Thompson SG. Quantifying heterogeneity in a meta-analysis. *Stat Med*  
10 2002;21(11):1539-58.  
11
- 12 17. DerSimonian R, Laird N. Meta-analysis in clinical trials. *Control Clin Trials* 1986;7(3):177-  
13 88.  
14
- 15 18. Hamling J, Lee P, Weitkunat R, *et al*. Facilitating meta-analyses by deriving relative effect  
16 and precision estimates for alternative comparisons from a set of estimates presented by  
17 exposure level or disease category. *Stat Med* 2008;27(7):954-70.  
18
- 19 19. Rota M, Bellocco R, Scotti L, *et al*. Random-effects meta-regression models for studying  
20 nonlinear dose-response relationship, with an application to alcohol and esophageal squamous  
21 cell carcinoma. *Stat Med* 2010;29(26):2679-87.  
22
- 23 20. Orsini N, Li R, Wolk A, *et al*. Meta-analysis for linear and nonlinear dose-response relations:  
24 examples, an evaluation of approximations, and software. *Am J Epidemiol* 2012;175(1):66-73.  
25  
26  
27  
28  
29  
30  
31  
32  
33  
34  
35  
36  
37  
38  
39  
40  
41  
42  
43  
44  
45  
46  
47  
48  
49  
50  
51  
52  
53  
54  
55  
56  
57  
58  
59  
60

1  
2  
3 **FIGURES LEGEND**  
4  
5  
6

7 **Figure 1.** Flowchart for the selection of papers in the umbrella review.  
8

9  
10 ISI WoS: ISI Web of Science

11  
12 CDSR: Cochrane Database of Systematic Reviews  
13

14  
15  
16  
17  
18 **Figure 2.** Flowchart for each of the 28 cancer-specific reviews.  
19  
20  
21  
22  
23  
24  
25  
26  
27  
28  
29  
30  
31  
32  
33  
34  
35  
36  
37  
38  
39  
40  
41  
42  
43  
44  
45  
46  
47  
48  
49  
50  
51  
52  
53  
54  
55  
56  
57  
58  
59  
60

For peer review only

1  
2  
3 **Appendix 1.** Literature search strings for the umbrella review used in various databases.  
4  
5  
6

7 ***MEDLINE***

8  
9 (neoplasms [MeSH Terms] OR cancer [title] OR cancers [title] OR neoplasm [title] OR neoplasms  
10 [title] OR leukaemia [title] OR leukemia [title] OR leukaemias [title] OR leukemias [title] OR  
11 carcinoma[title] OR maligna\*[title]) AND (meta-analysis OR "meta analysis" OR pooled-analysis  
12 OR "pooled analysis" OR "systematic review"[tiab] OR "systematic revision"[tiab]) AND (cigarette  
13 [title] OR cigarettes [title] OR tobacco [title] OR smoking [title] OR smokers [title] OR smoking  
14 [MeSH Terms])  
15  
16  
17  
18  
19  
20  
21  
22  
23  
24

25 ***Embase***

26  
27 (cancer:ti OR cancers:ti OR neoplasm:ti OR neoplasms:ti OR leukaemia:ti OR leukemia:ti OR  
28 leukaemias:ti OR leukemias:ti OR carcinoma:ti OR maligna\*:ti) AND ('meta analysis' OR 'pooled  
29 analysis' OR 'meta analysis':it) AND (cigarette:ti OR cigarettes:ti OR tobacco:ti OR smoking:ti OR  
30 smokers:ti)  
31  
32  
33  
34  
35  
36  
37

38 ***ISI Web of Science***

39  
40 TITLE: ((cancer OR cancers OR neoplasm OR neoplasms OR leukaemia OR leukemia OR  
41 leukaemias OR leukemias OR carcinoma OR maligna\*) AND (cigarette OR cigarettes OR tobacco  
42 OR smoking OR smokers)) AND TOPIC: ((meta-analysis OR "meta analysis" OR pooled-analysis  
43 OR "pooled analysis" OR "systematic review" OR "systematic revision")) NOT DOCUMENT  
44  
45  
46  
47  
48  
49 TYPES: (Letter OR Meeting Abstract OR Meeting Summary)  
50  
51  
52  
53

54 ***Cochrane Database of Systematic Reviews***

55  
56 (cancer:ti or cancers:ti or neoplasm:ti or neoplasms:ti or leukaemia:ti or leukemia:ti or leukaemias:ti  
57 or leukemias:ti or carcinoma:ti or maligna\*:ti) and (meta-analysis or "meta analysis" or pooled-  
58  
59  
60

1  
2  
3  
4  
5  
6  
7  
8  
9  
10  
11  
12  
13  
14  
15  
16  
17  
18  
19  
20  
21  
22  
23  
24  
25  
26  
27  
28  
29  
30  
31  
32  
33  
34  
35  
36  
37  
38  
39  
40  
41  
42  
43  
44  
45  
46  
47  
48  
49  
50  
51  
52  
53  
54  
55  
56  
57  
58  
59  
60

analysis or "pooled analysis") and (cigarette:ti or cigarettes:ti or tobacco:ti or smoking:ti or smokers:ti)

For peer review only

1  
2  
3 **Appendix 2.** Literature search strings for the update of the available reviews used in various  
4  
5 databases.

6  
7  
8  
9 ***MEDLINE***

10  
11 ((((*cancer site*) AND (cancer OR neoplasm OR carcinoma OR Neoplasms [MeSH Terms]) AND  
12 (cigarette OR cigarettes OR tobacco OR smoking OR smokers OR smoking [MeSH Terms]))) AND  
13 English[Language]) AND ("*last review year*"[Date - Publication]: "2017"[Date - Publication])

14  
15  
16  
17  
18  
19  
20  
21 ***Embase***

22 cigarette:ti OR cigarettes:ti OR tobacco:ti OR smoking:ti OR smokers:ti AND (*cancer site*:ab,ti)  
23 AND (cancer:ab,ti OR neoplasm:ab,ti OR carcinoma:ab,ti) AND (article:it OR review:it) AND  
24 [english]/lim AND [*last review year*-2017]/py NOT [medline]/lim  
25  
26  
27  
28  
29  
30  
31  
32  
33  
34  
35

36 *Cancer site* stands for the terms used to identify the site-specific cancer (e.g., for liver cancer, the  
37 combination of the following terms will be considered: liver, hepatocellular, hepatic).

38  
39  
40 *Last review year* refers to the year of publication of the most recent article included in the last  
41 comprehensive review.  
42  
43  
44  
45  
46  
47  
48  
49  
50  
51  
52  
53  
54  
55  
56  
57  
58  
59  
60



## UMBRELLA REVIEW

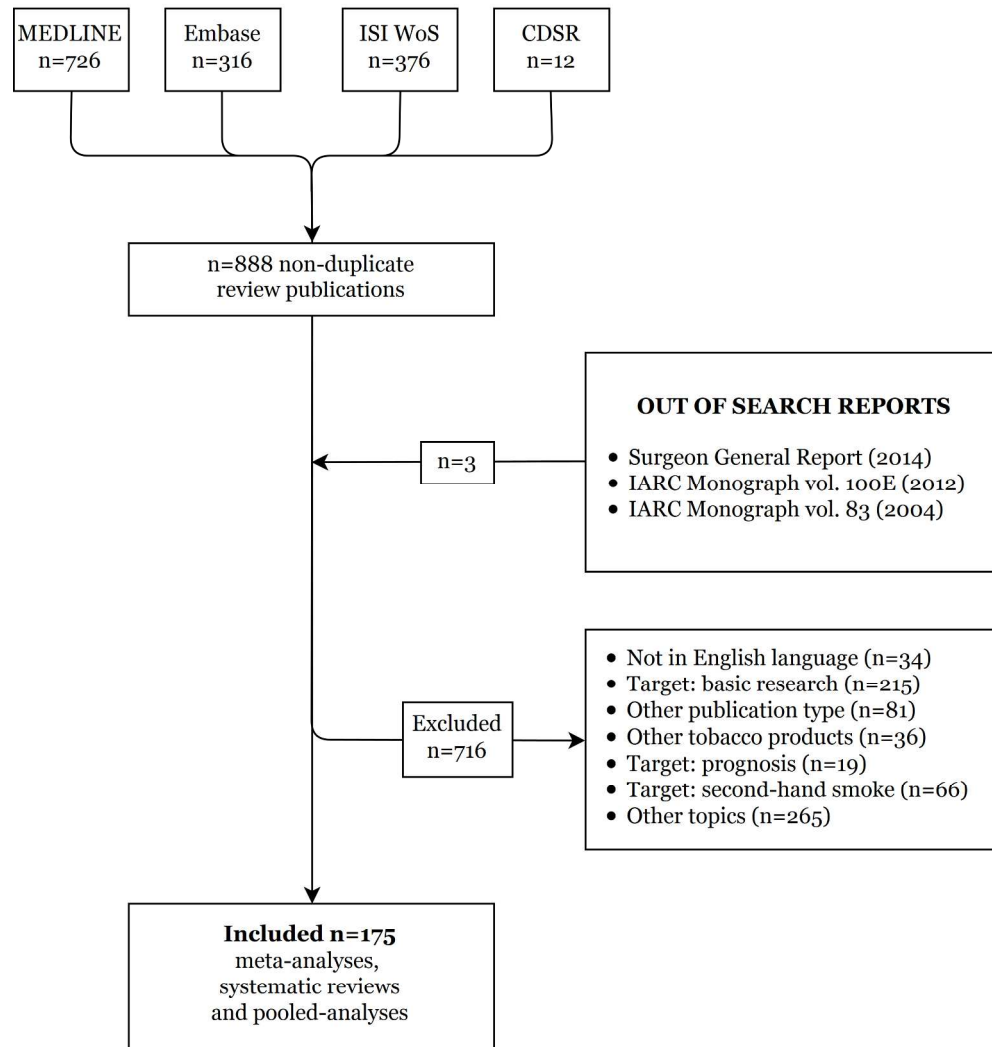

Figure 1. Flowchart for the selection of papers in the umbrella review.

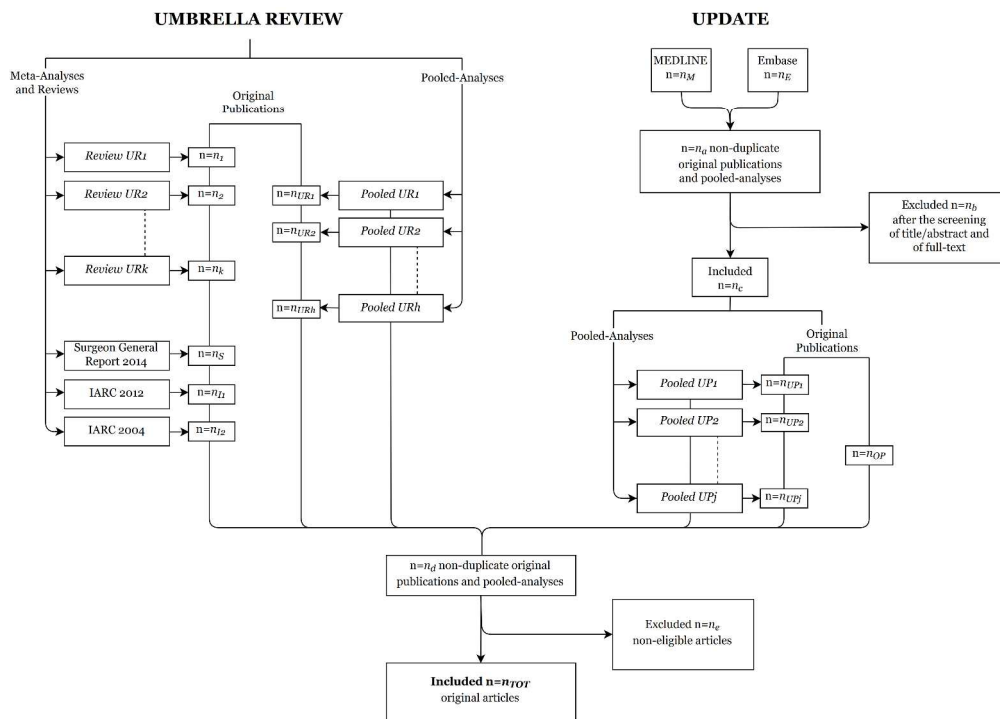

Figure 2. Flowchart for each of the 28 cancer-specific reviews.

**PRISMA-P (Preferred Reporting Items for Systematic review and Meta-Analysis Protocols) 2015 checklist: recommended items to address in a systematic review protocol\***

| Section and topic                 | Item No | Checklist item                                                                                                                                                                                                                | Page N° |
|-----------------------------------|---------|-------------------------------------------------------------------------------------------------------------------------------------------------------------------------------------------------------------------------------|---------|
| <b>ADMINISTRATIVE INFORMATION</b> |         |                                                                                                                                                                                                                               |         |
| Title:                            |         |                                                                                                                                                                                                                               |         |
| Identification                    | 1a      | Identify the report as a protocol of a systematic review                                                                                                                                                                      | 1       |
| Update                            | 1b      | If the protocol is for an update of a previous systematic review, identify as such                                                                                                                                            | NA      |
| Registration                      | 2       | If registered, provide the name of the registry (such as PROSPERO) and registration number                                                                                                                                    | 2       |
| Authors:                          |         |                                                                                                                                                                                                                               |         |
| Contact                           | 3a      | Provide name, institutional affiliation, e-mail address of all protocol authors; provide physical mailing address of corresponding author                                                                                     | 1       |
| Contributions                     | 3b      | Describe contributions of protocol authors and identify the guarantor of the review                                                                                                                                           | 15      |
| Amendments                        | 4       | If the protocol represents an amendment of a previously completed or published protocol, identify as such and list changes; otherwise, state plan for documenting important protocol amendments                               | NA      |
| Support:                          |         |                                                                                                                                                                                                                               |         |
| Sources                           | 5a      | Indicate sources of financial or other support for the review                                                                                                                                                                 | 15      |
| Sponsor                           | 5b      | Provide name for the review funder and/or sponsor                                                                                                                                                                             | NA      |
| Role of sponsor or funder         | 5c      | Describe roles of funder(s), sponsor(s), and/or institution(s), if any, in developing the protocol                                                                                                                            | NA      |
| <b>INTRODUCTION</b>               |         |                                                                                                                                                                                                                               |         |
| Rationale                         | 6       | Describe the rationale for the review in the context of what is already known                                                                                                                                                 | 5       |
| Objectives                        | 7       | Provide an explicit statement of the question(s) the review will address with reference to participants, interventions, comparators, and outcomes (PICO)                                                                      | 6       |
| <b>METHODS</b>                    |         |                                                                                                                                                                                                                               |         |
| Eligibility criteria              | 8       | Specify the study characteristics (such as PICO, study design, setting, time frame) and report characteristics (such as years considered, language, publication status) to be used as criteria for eligibility for the review | 7-9, 11 |
| Information sources               | 9       | Describe all intended information sources (such as electronic databases, contact with study authors, trial registers or other grey literature sources) with planned dates of coverage                                         | 7,10    |

|                                    |     |                                                                                                                                                                                                                                                  |       |
|------------------------------------|-----|--------------------------------------------------------------------------------------------------------------------------------------------------------------------------------------------------------------------------------------------------|-------|
| Search strategy                    | 10  | Present draft of search strategy to be used for at least one electronic database, including planned limits, such that it could be repeated                                                                                                       | 19-21 |
| Study records:                     |     |                                                                                                                                                                                                                                                  |       |
| Data management                    | 11a | Describe the mechanism(s) that will be used to manage records and data throughout the review                                                                                                                                                     | 9-12  |
| Selection process                  | 11b | State the process that will be used for selecting studies (such as two independent reviewers) through each phase of the review (that is, screening, eligibility and inclusion in meta-analysis)                                                  | 9-12  |
| Data collection process            | 11c | Describe planned method of extracting data from reports (such as piloting forms, done independently, in duplicate), any processes for obtaining and confirming data from investigators                                                           | 9-12  |
| Data items                         | 12  | List and define all variables for which data will be sought (such as PICO items, funding sources), any pre-planned data assumptions and simplifications                                                                                          | 9-12  |
| Outcomes and prioritization        | 13  | List and define all outcomes for which data will be sought, including prioritization of main and additional outcomes, with rationale                                                                                                             | 9     |
| Risk of bias in individual studies | 14  | Describe anticipated methods for assessing risk of bias of individual studies, including whether this will be done at the outcome or study level, or both; state how this information will be used in data synthesis                             | NA    |
| Data synthesis                     | 15a | Describe criteria under which study data will be quantitatively synthesised                                                                                                                                                                      | 13-14 |
|                                    | 15b | If data are appropriate for quantitative synthesis, describe planned summary measures, methods of handling data and methods of combining data from studies, including any planned exploration of consistency (such as $I^2$ , Kendall's $\tau$ ) | 13-14 |
|                                    | 15c | Describe any proposed additional analyses (such as sensitivity or subgroup analyses, meta-regression)                                                                                                                                            | 13-14 |
|                                    | 15d | If quantitative synthesis is not appropriate, describe the type of summary planned                                                                                                                                                               | NA    |
| Meta-bias(es)                      | 16  | Specify any planned assessment of meta-bias(es) (such as publication bias across studies, selective reporting within studies)                                                                                                                    | 13-14 |
| Confidence in cumulative evidence  | 17  | Describe how the strength of the body of evidence will be assessed (such as GRADE)                                                                                                                                                               | NA    |

**\* It is strongly recommended that this checklist be read in conjunction with the PRISMA-P Explanation and Elaboration (cite when available) for important clarification on the items. Amendments to a review protocol should be tracked and dated. The copyright for PRISMA-P (including checklist) is held by the PRISMA-P Group and is distributed under a Creative Commons Attribution Licence 4.0.**

*From: Shamseer L, Moher D, Clarke M, Ghersi D, Liberati A, Petticrew M, Shekelle P, Stewart L, PRISMA-P Group. Preferred reporting items for systematic review and meta-analysis protocols (PRISMA-P) 2015: elaboration and explanation. BMJ. 2015 Jan 2;349(jan02 1):g7647.*

# BMJ Open

## Dose-response relationship between cigarette smoking and site-specific cancer risk: protocol for a systematic review with an original design combining umbrella and traditional reviews

|                                 |                                                                                                                                                                                                                                                                                                                                                                                                                                                                                                                                                                                                                                                                                                                  |
|---------------------------------|------------------------------------------------------------------------------------------------------------------------------------------------------------------------------------------------------------------------------------------------------------------------------------------------------------------------------------------------------------------------------------------------------------------------------------------------------------------------------------------------------------------------------------------------------------------------------------------------------------------------------------------------------------------------------------------------------------------|
| Journal:                        | <i>BMJ Open</i>                                                                                                                                                                                                                                                                                                                                                                                                                                                                                                                                                                                                                                                                                                  |
| Manuscript ID                   | bmjopen-2017-018930.R1                                                                                                                                                                                                                                                                                                                                                                                                                                                                                                                                                                                                                                                                                           |
| Article Type:                   | Protocol                                                                                                                                                                                                                                                                                                                                                                                                                                                                                                                                                                                                                                                                                                         |
| Date Submitted by the Author:   | 01-Sep-2017                                                                                                                                                                                                                                                                                                                                                                                                                                                                                                                                                                                                                                                                                                      |
| Complete List of Authors:       | Lugo, Alessandra; IRCCS – Istituto di Ricerche Farmacologiche “Mario Negri”, Milan, Italy, Department of Environmental Health Sciences<br>Bosetti, Cristina; Istituto di Ricerche Farmacologiche “Mario Negri”, Department of Oncology<br>Peveri, Giulia; IRCCS – Istituto di Ricerche Farmacologiche “Mario Negri”, Department of Environmental Health Sciences<br>Rota, Matteo; Università degli Studi di Milano, Department of Biomedical and Clinical Sciences<br>Bagnardi, Vincenzo; Università degli Studi di Milano-Bicocca, Department of Statistics and Quantitative Methods<br>Gallus, Silvano; IRCCS – Istituto di Ricerche Farmacologiche “Mario Negri”, Department of Environmental Health Sciences |
| <b>Primary Subject Heading</b>: | Smoking and tobacco                                                                                                                                                                                                                                                                                                                                                                                                                                                                                                                                                                                                                                                                                              |
| Secondary Subject Heading:      | Epidemiology, Oncology, Public health, Research methods                                                                                                                                                                                                                                                                                                                                                                                                                                                                                                                                                                                                                                                          |
| Keywords:                       | Cancer, Risk, Cigarette smoking, Dose-response relationship, Systematic review, Meta-analysis                                                                                                                                                                                                                                                                                                                                                                                                                                                                                                                                                                                                                    |
|                                 |                                                                                                                                                                                                                                                                                                                                                                                                                                                                                                                                                                                                                                                                                                                  |

SCHOLARONE™  
Manuscripts

1  
2  
3 **Dose-response relationship between cigarette smoking and site-specific cancer risk: protocol**  
4  
5 **for a systematic review with an original design combining umbrella and traditional reviews**  
6  
7

8  
9 Alessandra LUGO<sup>1</sup>, Cristina BOSETTI<sup>2</sup>, Giulia PEVERI<sup>1</sup>,

10  
11 Matteo ROTA<sup>3</sup>, Vincenzo BAGNARDI<sup>4</sup>, Silvano GALLUS<sup>1</sup>  
12  
13

14  
15  
16 <sup>1</sup> Department of Environmental Health Sciences, IRCCS – Istituto di Ricerche Farmacologiche  
17  
18 “Mario Negri”, Milan, Italy  
19

20  
21 <sup>2</sup> Department of Oncology, IRCCS – Istituto di Ricerche Farmacologiche “Mario Negri”, Milan,  
22  
23 Italy  
24

25  
26 <sup>3</sup> Department of Biomedical and Clinical Sciences, Università degli Studi di Milano, Milan, Italy  
27

28  
29 <sup>4</sup> Department of Statistics and Quantitative Methods, Università degli Studi di Milano-Bicocca,  
30  
31 Milan, Italy  
32  
33  
34  
35

36 **Corresponding author**

37  
38 Alessandra Lugo, PhD

39  
40 Department of Environmental Health Sciences, Laboratory of Lifestyle Epidemiology,

41  
42 IRCCS – Istituto di Ricerche Farmacologiche “Mario Negri”, Milan, Italy  
43

44  
45 Via G. La Masa 19, 20156 Milan, Italy  
46

47  
48 tel: +390239014653 – fax: +390233200231  
49

50  
51 e-mail: [alessandra.lugo@marionegri.it](mailto:alessandra.lugo@marionegri.it)  
52  
53

54 **Word count:** 2912  
55  
56  
57  
58  
59  
60

## ABSTRACT

**Introduction.** Only a limited number of meta-analyses providing risk curve functions of dose-response relationships between various smoking variables and cancer-specific risk are available.

**Methods and analysis.** To identify all relevant original publications on the issue, we will conduct a series of comprehensive systematic reviews based on three subsequent literature searches: 1) an umbrella review, to identify meta-analyses, pooled-analyses, and systematic reviews published before 28<sup>th</sup> April 2017 on the association between cigarette smoking and the risk of 28 (namely all) malignant neoplasms; 2) for each cancer site, an updated review of original publications on the association between cigarette smoking and cancer risk, starting from the last available comprehensive review identified through the umbrella review; 3) a review of all original articles on the association between cigarette smoking and site-specific cancer risk included in the publications identified through the umbrella and the updated reviews. The primary outcomes of interest will be: i) the excess incidence/mortality of various cancers for smokers compared to never smokers; ii) the dose-response curves describing the association between smoking intensity, duration, and time since stopping and incidence/mortality for various cancers. For each cancer site, we will perform a meta-analysis by pooling study-specific estimates for smoking status. We will also estimate the dose-response curves for other smoking variables through random-effects meta-regression models based on a nonlinear dose-response relationship framework.

**Ethics and dissemination.** Ethics approval is not required for this study. Main results will be published in peer-reviewed journals and will also be included in a publicly available website. We will provide therefore the most complete and updated estimates on the association between various measures of cigarette smoking and site-specific cancer risk. This will allow us to obtain precise estimates on the cancer burden attributable to cigarette smoking.

**Systematic review registration.** This protocol was registered in PROSPERO (CRD42017063991).

1  
2  
3  
4  
5  
6  
7  
8  
9  
10  
11  
12  
13  
14  
15  
16  
17  
18  
19  
20  
21  
22  
23  
24  
25  
26  
27  
28  
29  
30  
31  
32  
33  
34  
35  
36  
37  
38  
39  
40  
41  
42  
43  
44  
45  
46  
47  
48  
49  
50  
51  
52  
53  
54  
55  
56  
57  
58  
59  
60

**Keywords:** cancer; risk; cigarette smoking; dose-response relationship; systematic review; meta-analysis.

For peer review only



## STRENGTHS AND LIMITATIONS OF THE STUDY

- This study represents the most complete and updated review on the association between cigarette smoking and site-specific cancer risk.
- We will not conduct a systematic review of the entire scientific literature on the issue, but we will rather use an original and innovative approach combining an umbrella review and traditional systematic reviews.
- We will carry out dose-response analyses using two-steps random-effects meta-regression models in order to examine potential nonlinear relationships between smoking-related variables and the risk of cancer.
- We will not systematically consider the assignment of a quality score to all original publications for each cancer site.

## INTRODUCTION

In 1950, Ernst Wynder and Evards Graham<sup>1</sup> and Richard Doll and Bradford Hill<sup>2</sup> first reported an association between tobacco smoking and lung cancer risk. Over the subsequent 65 years, thousands of studies systematically confirmed this association and found that tobacco smoking also increases the risk of several other neoplasms.<sup>3</sup> In 2004, tobacco smoking has been classified as carcinogenic to humans (Group 1) by the International Agency for Research on Cancer (IARC)<sup>3</sup>, which provided evidence on the causal relationship between cigarette smoking and cancer of the lung, oral cavity, nasal cavity and paranasal sinuses, nasopharynx, oropharynx, hypopharynx, larynx, oesophagus, stomach, pancreas, liver, kidney, ureter, urinary bladder, cervix and myeloid leukaemia.<sup>3</sup> The results on the association between (cigarette) smoking and other cancer sites, including cancers of the breast and endometrium, remain conflicting.<sup>3</sup>

Since late 1980s, publications reporting results from systematic reviews and meta-analyses, the large majority of which were unnecessary and misleading, rapidly increased.<sup>4</sup> Although the effects of cigarette smoking on cancer incidence and/or mortality have been largely investigated, only a limited number of systematic reviews/meta-analyses are available on the quantification of the dose-response relationship between selected smoking variables, including smoking intensity, duration, pack-years and time since quitting, and the risk of cancer. More importantly, just a few meta-analyses, if any, provided the cancer-specific risk curve functions of the dose-response relationships. Dose-response data, however, are crucial to provide reliable and accurate estimates of the cancer burden due to smoking, both at individual - absolute cancer incidence/mortality obtained through lung cancer risk-assessment models and risk charts<sup>5 6</sup> - and population level - smoking attributable deaths.<sup>7 8</sup> Currently, the methods developed to quantify the cancer burden due to smoking use cancer-specific estimates of relative risks (RR) according to tobacco smoking derived from a few large cohorts, mainly from the USA.<sup>9</sup> The use of these cohorts to derive RRs may lead to validity problems when applying these estimates to other populations with different smoking patterns.<sup>7 10</sup> Furthermore, these RRs are often estimated after allowance for a limited number of

1  
2  
3 socio-demographic characteristics, excluding potentially important confounding variables, such as  
4  
5 alcohol drinking.

6  
7 Using an original and innovative approach, which combines an umbrella review and traditional  
8  
9 systematic reviews, we aim at providing a comprehensive and updated picture of the association  
10  
11 between various smoking-related variables and the risk of all cancers. We will be able to estimate  
12  
13 the most robust cancer-specific RRs, obtained from the existing scientific literature, possibly  
14  
15 derived after adjustment for relevant covariates. Moreover, for each cancer site, we will be able to  
16  
17 provide the risk curves which best describe the dose-response effect of smoking intensity, smoking  
18  
19 duration, pack-years, and time since stopping smoking on cancer risk.  
20  
21  
22  
23  
24  
25  
26

## 27 **METHODS**

28  
29 The present cancer-specific systematic reviews/meta-analyses will be based on the following three  
30  
31 subsequent literature searches on the association between cigarette smoking and cancer risk:  
32  
33

- 34 1. Umbrella review: a systematic review to identify published meta-analyses, pooled-analyses, and  
35  
36 systematic reviews providing data on the association between cigarette smoking and cancer risk;  
37
- 38 2. Update of available cancer-specific reviews: for each cancer site, the conduction of a systematic  
39  
40 review of studies providing original data (including pooled-analyses on individual participants data)  
41  
42 on the association between cigarette smoking and cancer-specific risk, starting from the last  
43  
44 available comprehensive review publication identified through the umbrella review (point 1);  
45  
46
- 47 3. Review of all original publications: a review of all original articles on the association between  
48  
49 cigarette smoking and site-specific cancer risk included in the cancer-specific review publications  
50  
51 identified through the umbrella review (point 1) or identified through the update of the available  
52  
53 reviews (point 2).  
54  
55

56 The design of the present systematic reviews was developed following the Preferred Reporting  
57  
58 Items for Systematic review and Meta-Analyses (PRISMA) guidelines<sup>11</sup> and its extension for  
59  
60

1  
2  
3 protocols (PRISMA-P).<sup>12 13</sup> This protocol was registered in the International Prospective Register of  
4  
5 Systematic Reviews (PROSPERO) on 4 May 2017 (registration number: CRD42017063991).  
6  
7  
8  
9  
10

## 11 **1. Umbrella review**

### 12 ***Search strategy***

13  
14  
15 We will conduct a systematic literature search to identify all published meta-analyses, pooled-  
16  
17 analyses, and systematic reviews providing data on the association between cigarette smoking and  
18  
19 the risk of various cancers. Literature search strategy will include combinations of Medical Subjects  
20  
21 Headings (MeSH) and text words related to *cancer* and *tobacco* or *smoking*, and will be restricted to  
22  
23 the following publication types: meta-analyses, pooled-analyses, and systematic reviews. No  
24  
25 restriction on cancer site or on publication date will be applied. The following databases will be  
26  
27 used: MEDLINE, Embase, ISI Web of Science (WoS), and Cochrane Database of Systematic  
28  
29 Reviews (CDSR). The search strings to be used in various databases are reported in **Appendix 1**.  
30  
31 To ensure literature saturation, reference lists of selected relevant publications identified through  
32  
33 the search will also be checked. Besides the publications found through the databases searches, we  
34  
35 will also consider the reviews of the literature on tobacco smoking provided within the IARC  
36  
37 monographs vol. 83<sup>3</sup> and vol. 100E<sup>14</sup> and the Surgeon General Report<sup>15</sup>, three reports of known  
38  
39 importance providing data on the association between tobacco smoking and various cancer sites.  
40  
41  
42  
43  
44  
45  
46

### 47 ***Eligibility criteria***

#### 48 ***Study design***

49  
50 We will include meta-analyses, pooled-analyses and systematic reviews of observational studies  
51  
52 providing measures of RRs between cigarette smoking and cancer risk. Original observational  
53  
54 studies (e.g., case-control, cohort or cross-sectional studies) will be excluded. Reports, letters to the  
55  
56 editor, book chapters, conference proceedings, dissertations, and theses will be not considered.  
57  
58  
59  
60

### *Conditions*

We will consider publications providing data on the following 28 (namely all) malignant neoplasms: cancer of lip, oral cavity and pharynx (ICD-10: C00-C14), nasopharynx (C11), oesophagus (C15), stomach (C16), colon (C18), rectum and anus (C19-C21), liver (C22), gallbladder (C23-C24), pancreas (C25), larynx (C32), lung trachea and bronchus (C33-C34), bone (C40-C41), melanoma of skin (C43), mesothelioma (C45), breast (C50), cervix uteri (C53), corpus uteri (C54), ovary (C56), prostate (C61), testis (C62), kidney (C64), bladder (C67), brain, central nervous system (C70-C72), thyroid (C73), Hodgkin lymphoma (C81), non-Hodgkin lymphoma (C82-C86, C96), multiple myeloma (C88-C90) and leukaemia (C91-C95). We will also consider review publications on groups of cancers (e.g., head and neck, upper aero-digestive tract, or intestinal cancers). Studies specifically based on benign neoplasms, such as colorectal polyps, acoustic neuroma and meningioma, and neuroendocrine tumours will be excluded.

### *Participants*

We will include review publications providing data on humans, in the general population. We will therefore exclude review publications based on patients with cancer or other diseases (i.e., reporting data on the effect of smoking on the prognosis of the disease), or on subgroups of the population with selected lifestyle habits or other characteristics (e.g., populations limited to alcohol drinkers or tobacco smokers). No restriction will be applied according to age of participants at cancer incidence or mortality given that practically all studies providing data on the association between cigarette smoking and cancer risk are based on adults, only.

### *Exposures*

We will include all review publications providing data on the use of cigarettes in the general population. Publications focused on the use of tobacco products other than cigarettes (e.g., pipe, smokeless tobacco, cigar, water pipe, electronic cigarettes) or on the exposure to second-hand smoke will be excluded.

### *Outcomes*

The primary outcomes of interest will be: i) the excess incidence and/or mortality of various cancers in current/ever smokers compared to non/never smokers; ii) the dose-response curves describing the association between cigarette smoking duration, intensity and time since stopping and incidence and/or mortality for various cancers.

### *Languages*

We will include only articles published in English language.

### *Study selection*

All the review publications found in various electronic databases through the above mentioned search strategy will be uploaded in an EndNote library (EN1), and duplicate records will be deleted. Titles and/or abstracts of the meta-analyses, pooled-analyses and systematic reviews will be screened independently by two reviewers (AL, GP) to exclude publications which will not meet the eligibility criteria. The full text of the remaining review publications will be retrieved and independently assessed for eligibility by the two reviewers. Discrepancies between the two reviewers will be discussed and solved. In case of disagreement, a third reviewer (SG) will help to find a final decision. Data from other available reports will also be integrated in the same EN1 library.

### *Quality assessment*

Assessment of the quality of various review publications is out of the scope of the present systematic review. Thus, no quality score will be assigned to the publications. No review publication will be excluded *a priori* for weakness of design or data quality.

### *Data extraction and management*

1  
2  
3 A standardised form in Microsoft (MS) Excel will be used to extract data from each identified  
4 review publication. Relevant information will include: first author, year of publication, type of  
5 study (i.e., meta-analysis, pooled-analysis, or systematic review), cancer site(s) and/or subsite(s),  
6 endpoint (i.e., incidence and/or mortality), and other information about the methodology of studies  
7 included in the reviews (e.g., study design, country(ies) of study conduction, number of studies  
8 considered in, and overall population size). Data will be extracted from each included meta-  
9 analysis, pooled analysis or systematic review by one reviewer and verified by a second reviewer.  
10 Any disagreement between the two reviewers will be solved by consensus. Otherwise, a third  
11 reviewer will help to find a final decision. After data extraction, publications will be grouped  
12 according to the considered cancer site.  
13  
14  
15  
16  
17  
18  
19  
20  
21  
22  
23  
24  
25  
26

### 27 ***Preliminary umbrella review***

28  
29 In April 2017, we already conducted a preliminary umbrella review through which we identified the  
30 meta-analyses, pooled-analyses and systematic reviews on the association between smoking and  
31 cancer risk published before 28<sup>th</sup> April 2017. Within the comprehensive literature search, we found  
32 a total of 1430 publications from the four considered databases (726 from Medline, 316 from  
33 Embase, 376 from ISI WoS, and 12 from CDSR; **Figure 1**). After the exclusion of duplicates  
34 (n=542) and ineligible papers (n=716), and after the inclusion of three important reports<sup>3 14 15</sup>, we  
35 obtained a total of 175 relevant publications (i.e., 107 meta-analyses, 52 pooled-analyses, and 16  
36 systematic reviews) on the association between smoking and risk of various neoplasms.  
37  
38  
39  
40  
41  
42  
43  
44  
45  
46  
47  
48  
49  
50  
51

## 52 **2. Update of the available cancer-specific reviews**

### 53 ***Search strategy***

54  
55 For each of the 28 cancer sites previously described in the umbrella review, we will identify the last  
56 available comprehensive systematic review or meta-analysis on the association with cigarette  
57  
58  
59  
60

1  
2  
3 smoking. We will then update the identified cancer-specific review through the conduction of a  
4 systematic literature search on all observational studies (e.g., case-control, cohort, and nested case-  
5 control studies) providing original data on the association between cigarette smoking and site-  
6 specific cancer risk, and published after the year of publication of the most recent article included in  
7 the last comprehensive review. Only studies published in English language will be considered.  
8  
9

10  
11 The literature search strategy will be conducted in MEDLINE and Embase, and will include  
12 combinations of MeSH terms and text words related to *site-specific cancer* and *tobacco* or *smoking*  
13 (Appendix 2).  
14  
15  
16  
17  
18  
19

## 20 21 22 ***Eligibility criteria***

### 23 ***Study design***

24  
25 We will include original observational studies (e.g., case-control, cohort, nested case-control  
26 studies, or pooled-analysis of individual participant data) providing measures of RRs of the  
27 association between cigarette smoking and site-specific cancer risk. Reports, book chapters,  
28 conference proceedings, dissertations, and theses will not be considered. We will exclude case-  
29 control studies using patients with cancer or other chronic diseases as comparison group.  
30  
31  
32  
33  
34  
35  
36  
37

### 38 ***Comparator***

39  
40 Never smokers are our comparators. We will in fact consider, as the measure of association, the  
41 RRs of smoking variables compared to never smokers.  
42  
43  
44

45 Eligibility criteria for *conditions*, *participants*, *exposures*, and *outcomes* are those reported also for  
46 the umbrella review.  
47  
48  
49

### 50 51 ***Study selection***

52  
53 For each cancer site, we will upload all the original publications found using the above mentioned  
54 search strategy in cancer-specific EndNote libraries (EN2\_1-EN2\_28) and we will delete the  
55 identified duplicates. Titles and/or abstracts of original articles will be screened independently by  
56  
57  
58  
59  
60



1  
2  
3 two reviewers (AL, GP) to exclude publications that do not meet the inclusion criteria outlined  
4 above. The full text of the remaining original publication will be retrieved and independently  
5 assessed for eligibility by the two reviewers. Discrepancies on the assessment between the two  
6 reviewers will be discussed and solved. In case of disagreement, a third reviewer (SG) will help to  
7 find a final decision.  
8  
9  
10  
11  
12

### 13 **3. Review of all original publications**

14  
15  
16  
17  
18 For each cancer site, we will upload in an EndNote library (EN3\_1-EN3\_28) all the original  
19 publications obtained from the 28 cancer-specific reviews identified in the umbrella review (point  
20 1). In the same EndNote libraries, we will add the original publications obtained from the  
21 corresponding updates of the reviews (point 2), and duplicate publications will be deleted. The full  
22 text of all the retained original publications will be retrieved. Non-English reports, unpublished  
23 studies, conference proceedings, dissertations and theses will be excluded.  
24  
25  
26  
27  
28  
29  
30  
31  
32

33  
34 **Figure 2** shows the flowchart we will consider for each of the 28 cancer-specific reviews. For each  
35 cancer site, original publications from both the umbrella review and the update of the reviews will  
36 be considered.  
37  
38  
39  
40  
41  
42

### 43 ***Quality assessment***

44  
45 Although quality assessment of original publications is out of the scope of the present systematic  
46 review, we do not exclude the possibility, at least for selected neoplasms, to assign a quality score  
47 to the original publications in order to conduct sensitivity analyses excluding the publications with a  
48 relatively low quality. In this case, the quality (risk of bias) for each observational study will be  
49 assessed using the Newcastle-Ottawa scale for observational studies.<sup>16</sup>  
50  
51  
52  
53  
54  
55  
56  
57  
58  
59  
60

### 61 ***Data extraction and management***

1  
2  
3 For each cancer site, two standardised forms in MS Excel will be used to collect relevant  
4 information on the study design and the risk estimates from the original publications. A first form  
5 will be used to extract data related to the study design including: first author, year of publication,  
6 journal, country, study name, period and design of study, outcome and sample size. In the second  
7 form we will collect the exposure categories (i.e., smoking status, intensity, duration, pack-years,  
8 age at starting, time since stopping), and corresponding RR estimates (or other estimates, such as  
9 odds ratios and hazard ratios) and 95% confidence intervals (CIs). The number of cases in each  
10 exposure category and covariates used in the model will be also collected. When the results of the  
11 same study have been published in more than one original publication, only data from the most  
12 recent and/or complete article will be retained and reported in the second Excel form.  
13  
14  
15  
16  
17  
18  
19  
20  
21  
22  
23  
24  
25  
26

### 27 *Data analysis*

28  
29 For each cancer site, we will pool all the RRs or other risk estimates (e.g., hazard ratios and odds  
30 ratios) in order to obtain the association between smoking status (separately for current, former and  
31 ever compared to never smokers) and the risk of cancer. Because cancer is a relatively rare  
32 outcome, we assume that ORs, risk ratios and rate ratios are all comparable estimates of the RR.  
33 Heterogeneity between studies will be assessed using the Cochran Q test and the I-squared  
34 statistics, i.e. the proportion of total variation contributed by between-study heterogeneity.<sup>17</sup> As we  
35 anticipated between study heterogeneity, we will present pooled RRs from random-effects models  
36 using the DerSimonian and Laird moment estimator of the between-study variance component.<sup>18</sup>  
37 However, if no heterogeneity between-study is detected, pooled estimates from the random-effects  
38 model will correspond to those deriving from the fixed-effect model.  
39  
40  
41  
42  
43  
44  
45  
46  
47  
48  
49  
50

51 When RRs are not reported for ever smokers, but only separately for current and former smokers,  
52 we will use the method for pooling non-independent estimates described by Hamling et al.<sup>19</sup> to  
53 obtain RRs for ever smokers besides those for current and former compared to never smokers.  
54  
55  
56  
57  
58  
59  
60

1  
2  
3 This method uses the number of subjects exposed to different levels of smoking and non-exposed  
4 subjects, and the corresponding risk estimates, to derive a set of pseudo-numbers of cases and  
5 controls/subjects at risk, by taking into account the correlation between the original estimates due to  
6 the common reference group. The obtained pseudo-numbers will be used to compute the new  
7 adjusted RR. This methodology will also be used to convert RR estimates when the reference  
8 category considered in the study is not represented by never smokers.  
9

10  
11 For smoking intensity, duration and time since stopping smoking, we will compute pooled RRs  
12 according to various categories of the considered smoking-related variables (e.g, low, intermediate,  
13 high cigarette consumption). Moreover, we will carry out dose-response analyses using two-steps  
14 random-effects meta-regression models in order to examine potential nonlinear relationships  
15 between those variables and the risk of cancer. In particular, we will consider a method providing  
16 the best fitting two-term fractional polynomial model<sup>20</sup>, and a method modelling the considered  
17 smoking-related variables using restricted cubic splines.<sup>21</sup>  
18  
19

20  
21 If the necessary data are available, we will consider to further conduct separate analyses by sex,  
22 study period, geographic area, and income (defined on the basis of per-capita Gross Domestic  
23 Product).  
24  
25

26  
27 Analyses will be conducted using SAS software version 9.4 (SAS Institute Inc., Cary, NC, USA),  
28 and R software version 3.3.0 (R Development Core Team, 2008), in particular *meta* and *dosresmeta*  
29 packages.  
30  
31  
32  
33  
34  
35  
36  
37

## 38 **ETHICS AND DISSEMINATION**

### 39 ***Ethics***

40  
41 This review does not require approval from an ethics committee, since no individual-level patients'  
42 data will be collected.  
43  
44  
45  
46  
47  
48  
49  
50  
51  
52  
53  
54  
55  
56  
57  
58  
59  
60

### *Implications and dissemination*

Through these systematic reviews and meta-analyses, we will provide the most complete and updated estimates on the association between cigarette smoking and site-specific cancer risk. These estimates will be used to quantify the cancer burden due to cigarette smoking at both individual and population level. This information is essential to guide policy decisions to control tobacco smoking and improve cancer prevention.

Given the relevance and originality of this project, we plan to publish results from the meta-analyses in peer-reviewed journals, considering either single cancer sites or various apparatus or tracts. A final publication will provide the summary results for all cancers. We will also include the main results of our systematic reviews and meta-analyses in a publicly available website. Readers will have the possibility to contact us to communicate possible lacks or updates.

### Contributions

SG and AL had the original idea of the work. AL, GP, and SG structured the study protocol, designed the search strategies, and conducted the umbrella review. MR, VB, and CB provided statistical and epidemiological supervision. All authors critically revised the draft of the manuscript and approved its final version.

### Funding

This work was partially supported by the Italian League Against Cancer (Milan). AL was supported by a fellowship from the Italian Association for Cancer Research (AIRC). MR was supported by a fellowship from the Italian Foundation for Cancer Research (FIRC).

### Competing interests

None declared.

## REFERENCES

1. Wynder EL, Graham EA. Tobacco smoking as a possible etiologic factor in bronchiogenic carcinoma; a study of 684 proved cases. *J Am Med Assoc* 1950;143(4):329-36.
2. Doll R, Hill AB. Smoking and carcinoma of the lung; preliminary report. *Br Med J* 1950;2(4682):739-48.
3. IARC. IARC Monographs on the Evaluation of Carcinogenic Risks to Humans. Volume 83. Tobacco Smoke and Involuntary Smoking. Lyon, France: International Agency for Research on Cancer 2004.
4. Ioannidis JP. The Mass Production of Redundant, Misleading, and Conflicted Systematic Reviews and Meta-analyses. *Milbank Q* 2016;94(3):485-514.
5. Spitz MR, Hong WK, Amos CI, *et al*. A risk model for prediction of lung cancer. *J Natl Cancer Inst* 2007;99(9):715-26.
6. Tammemagi MC, Katki HA, Hocking WG, *et al*. Selection criteria for lung-cancer screening. *N Engl J Med* 2013;368(8):728-36.
7. Perez-Rios M, Montes A. Methodologies used to estimate tobacco-attributable mortality: a review. *BMC Public Health* 2008;8:22.
8. Tachfouti N, Raheison C, Obtel M, *et al*. Mortality attributable to tobacco: review of different methods. *Arch Public Health* 2014;72(1):22.
9. ACS. Cancer Prevention Study II (CPS II). Available at: <http://www.cancer.org/research/researchtopreventcancer/currentcancerpreventionstudies/cancer-prevention-study> 2016
10. Gallus S, Muttarak R, Martinez-Sanchez JM, *et al*. Smoking prevalence and smoking attributable mortality in Italy, 2010. *Prev Med* 2011;52(6):434-8.
11. Moher D, Liberati A, Tetzlaff J, *et al*. Preferred reporting items for systematic reviews and meta-analyses: the PRISMA statement. *BMJ* 2009;339:b2535.

12. Moher D, Shamseer L, Clarke M, *et al.* Preferred reporting items for systematic review and meta-analysis protocols (PRISMA-P) 2015 statement. *Syst Rev* 2015;4:1.
13. Shamseer L, Moher D, Clarke M, *et al.* Preferred reporting items for systematic review and meta-analysis protocols (PRISMA-P) 2015: elaboration and explanation. *BMJ* 2015;349:g7647.
14. IARC. IARC monograph on the evaluation of carcinogenic risks to humans. Volume 100E. A review of human carcinogens - Personal habits and indoor combustions. Available at: <http://monographs.iarc.fr/ENG/Monographs/vol100E/mono100E.pdf>. Lyon, France2012.
15. U.S. Department of Health and Human Services. The Health Consequences of Smoking - 50 Years of Progress A Report of the Surgeon General. Available at: <https://www.surgeongeneral.gov/library/reports/50-years-of-progress/full-report.pdf>. Atlanta, GA2014.
16. Wells GA, Shea B, O'Connell D, *et al.* The Newcastle-Ottawa Scale (NOS) for assessing the quality if nonrandomized studies in meta-analyses. Available online at: [http://www.ohri.ca/programs/clinical\\_epidemiology/oxford.htm](http://www.ohri.ca/programs/clinical_epidemiology/oxford.htm). 2014
17. Higgins JP, Thompson SG. Quantifying heterogeneity in a meta-analysis. *Stat Med* 2002;21(11):1539-58.
18. DerSimonian R, Laird N. Meta-analysis in clinical trials. *Control Clin Trials* 1986;7(3):177-88.
19. Hamling J, Lee P, Weitkunat R, *et al.* Facilitating meta-analyses by deriving relative effect and precision estimates for alternative comparisons from a set of estimates presented by exposure level or disease category. *Stat Med* 2008;27(7):954-70.
20. Rota M, Bellocco R, Scotti L, *et al.* Random-effects meta-regression models for studying nonlinear dose-response relationship, with an application to alcohol and esophageal squamous cell carcinoma. *Stat Med* 2010;29(26):2679-87.

- 1  
2  
3 21. Orsini N, Li R, Wolk A, *et al.* Meta-analysis for linear and nonlinear dose-response  
4 relations: examples, an evaluation of approximations, and software. *Am J Epidemiol*  
5 2012;175(1):66-73.  
6  
7  
8  
9  
10  
11  
12  
13  
14  
15  
16  
17  
18  
19  
20  
21  
22  
23  
24  
25  
26  
27  
28  
29  
30  
31  
32  
33  
34  
35  
36  
37  
38  
39  
40  
41  
42  
43  
44  
45  
46  
47  
48  
49  
50  
51  
52  
53  
54  
55  
56  
57  
58  
59  
60

For peer review only



1  
2  
3 **FIGURES LEGEND**  
4  
5  
6

7 **Figure 1.** Flowchart for the selection of papers (published before 28<sup>th</sup> April 2017) in the umbrella  
8 review.  
9

10  
11 ISI WoS: ISI Web of Science

12  
13  
14 CDSR: Cochrane Database of Systematic Reviews  
15  
16  
17  
18  
19

20  
21 **Figure 2.** Flowchart for each of the 28 cancer-specific reviews.  
22  
23  
24  
25  
26  
27  
28  
29  
30  
31  
32  
33  
34  
35  
36  
37  
38  
39  
40  
41  
42  
43  
44  
45  
46  
47  
48  
49  
50  
51  
52  
53  
54  
55  
56  
57  
58  
59  
60

1  
2  
3  
4  
5  
6  
7  
8  
9  
10  
11  
12  
13  
14  
15  
16  
17  
18  
19  
20  
21  
22  
23  
24  
25  
26  
27  
28  
29  
30  
31  
32  
33  
34  
35  
36  
37  
38  
39  
40  
41  
42  
43  
44  
45  
46  
47  
48  
49  
50  
51  
52  
53  
54  
55  
56  
57  
58  
59  
60

### UMBRELLA REVIEW

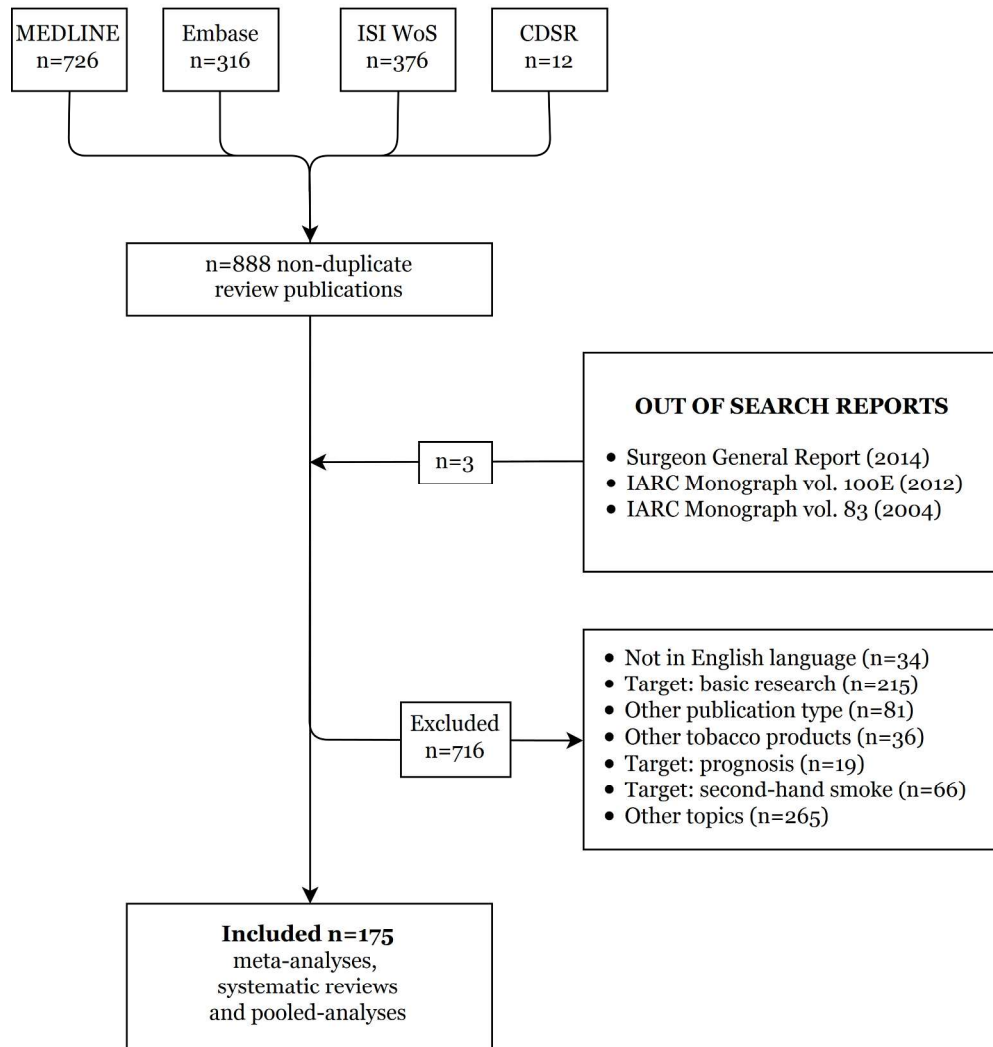

Figure 1. Flowchart for the selection of papers (published before 28th April 2017) in the umbrella review.

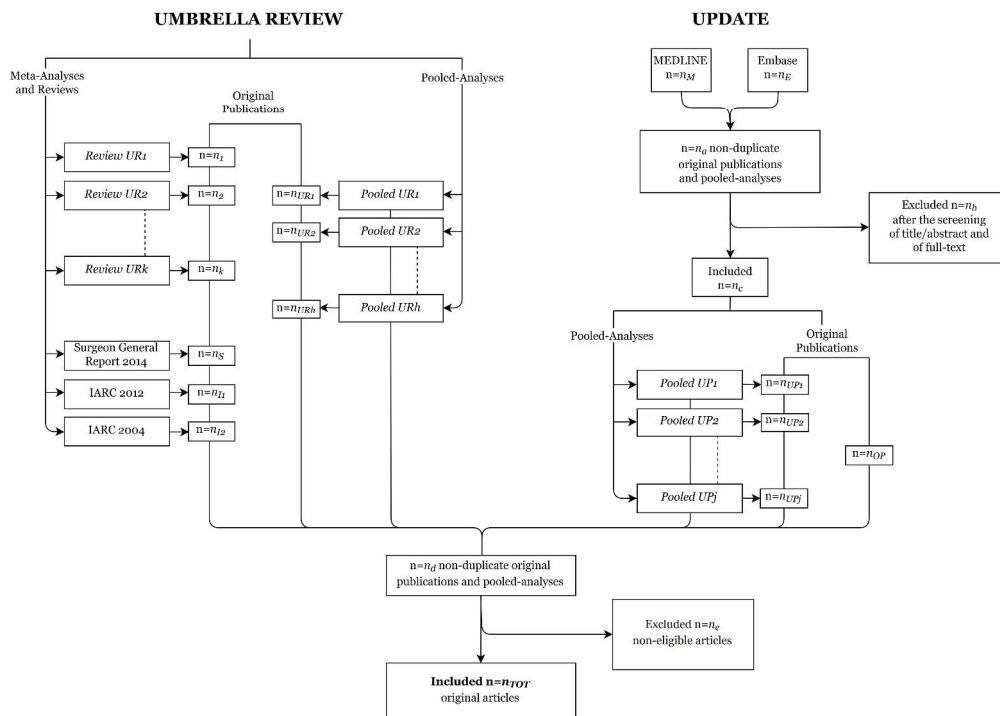

Figure 2. Flowchart for each of the 28 cancer-specific reviews.

1  
2  
3 **Appendix 1.** Literature search strings for the umbrella review used in various databases.  
4  
5  
6

7  
8 ***MEDLINE***  
9

10 (neoplasms [MeSH Terms] OR cancer [title] OR cancers [title] OR neoplasm [title] OR neoplasms  
11 [title] OR leukaemia [title] OR leukemia [title] OR leukaemias [title] OR leukemias [title] OR  
12 carcinoma[title] OR maligna\*[title]) AND (meta-analysis OR "meta analysis" OR pooled-analysis  
13 OR "pooled analysis" OR "systematic review"[tiab] OR "systematic revision"[tiab]) AND (cigarette  
14 [title] OR cigarettes [title] OR tobacco [title] OR smoking [title] OR smokers [title] OR smoking  
15 [MeSH Terms])  
16  
17  
18  
19  
20  
21  
22  
23  
24

25  
26  
27 ***Embase***  
28

29 (cancer:ti OR cancers:ti OR neoplasm:ti OR neoplasms:ti OR leukaemia:ti OR leukemia:ti OR  
30 leukaemias:ti OR leukemias:ti OR carcinoma:ti OR maligna\*:ti) AND ('meta analysis' OR 'pooled  
31 analysis' OR 'meta analysis':it) AND (cigarette:ti OR cigarettes:ti OR tobacco:ti OR smoking:ti OR  
32 smokers:ti)  
33  
34  
35  
36  
37  
38  
39

40  
41 ***ISI Web of Science***  
42

43 TITLE: ((cancer OR cancers OR neoplasm OR neoplasms OR leukaemia OR leukemia OR  
44 leukaemias OR leukemias OR carcinoma OR maligna\*) AND (cigarette OR cigarettes OR tobacco  
45 OR smoking OR smokers)) AND TOPIC: ((meta-analysis OR "meta analysis" OR pooled-analysis  
46 OR "pooled analysis" OR "systematic review" OR "systematic revision")) NOT DOCUMENT  
47  
48  
49  
50  
51  
52  
53 TYPES: (Letter OR Meeting Abstract OR Meeting Summary)  
54  
55  
56

57  
58 ***Cochrane Database of Systematic Reviews***  
59

60 (cancer:ti or cancers:ti or neoplasm:ti or neoplasms:ti or leukaemia:ti or leukemia:ti or leukaemias:ti  
or leukemias:ti or carcinoma:ti or maligna\*:ti) and (meta-analysis or "meta analysis" or pooled-

1  
2  
3 analysis or "pooled analysis") and (cigarette:ti or cigarettes:ti or tobacco:ti or smoking:ti or  
4  
5 smokers:ti)  
6  
7  
8  
9  
10  
11  
12  
13  
14  
15  
16  
17  
18  
19  
20  
21  
22  
23  
24  
25  
26  
27  
28  
29  
30  
31  
32  
33  
34  
35  
36  
37  
38  
39  
40  
41  
42  
43  
44  
45  
46  
47  
48  
49  
50  
51  
52  
53  
54  
55  
56  
57  
58  
59  
60

For peer review only

1  
2  
3 **Appendix 2.** Literature search strings for the update of the available reviews used in various  
4  
5 databases.  
6  
7  
8  
9

10 ***MEDLINE***

11  
12 ((((*cancer site*) AND (cancer OR neoplasm OR carcinoma OR Neoplasms [MeSH Terms]) AND  
13 (cigarette OR cigarettes OR tobacco OR smoking OR smokers OR smoking [MeSH Terms]))) AND  
14  
15 English[Language]) AND ("*last review year*"[Date - Publication]: "2017"[Date - Publication])  
16  
17  
18  
19

20  
21  
22 ***Embase***

23  
24 cigarette:ti OR cigarettes:ti OR tobacco:ti OR smoking:ti OR smokers:ti AND (*cancer site*:ab,ti)  
25  
26 AND (cancer:ab,ti OR neoplasm:ab,ti OR carcinoma:ab,ti) AND (article:it OR review:it) AND  
27  
28 [english]/lim AND [*last review year*-2017]/py NOT [medline]/lim  
29  
30  
31  
32  
33  
34  
35  
36  
37  
38

39 *Cancer site* stands for the terms used to identify the site-specific cancer (e.g., for liver cancer, the  
40  
41 combination of the following terms will be considered: liver, hepatocellular, hepatic).  
42

43 *Last review year* refers to the year of publication of the most recent article included in the last  
44  
45 comprehensive review.  
46  
47  
48  
49  
50  
51  
52  
53  
54  
55  
56  
57  
58  
59  
60

**PRISMA-P (Preferred Reporting Items for Systematic review and Meta-Analysis Protocols) 2015 checklist: recommended items to address in a systematic review protocol\***

| Section and topic                 | Item No | Checklist item                                                                                                                                                                                                                | Page N° |
|-----------------------------------|---------|-------------------------------------------------------------------------------------------------------------------------------------------------------------------------------------------------------------------------------|---------|
| <b>ADMINISTRATIVE INFORMATION</b> |         |                                                                                                                                                                                                                               |         |
| Title:                            |         |                                                                                                                                                                                                                               |         |
| Identification                    | 1a      | Identify the report as a protocol of a systematic review                                                                                                                                                                      | 1       |
| Update                            | 1b      | If the protocol is for an update of a previous systematic review, identify as such                                                                                                                                            | NA      |
| Registration                      | 2       | If registered, provide the name of the registry (such as PROSPERO) and registration number                                                                                                                                    | 2       |
| Authors:                          |         |                                                                                                                                                                                                                               |         |
| Contact                           | 3a      | Provide name, institutional affiliation, e-mail address of all protocol authors; provide physical mailing address of corresponding author                                                                                     | 1       |
| Contributions                     | 3b      | Describe contributions of protocol authors and identify the guarantor of the review                                                                                                                                           | 15      |
| Amendments                        | 4       | If the protocol represents an amendment of a previously completed or published protocol, identify as such and list changes; otherwise, state plan for documenting important protocol amendments                               | NA      |
| Support:                          |         |                                                                                                                                                                                                                               |         |
| Sources                           | 5a      | Indicate sources of financial or other support for the review                                                                                                                                                                 | 15      |
| Sponsor                           | 5b      | Provide name for the review funder and/or sponsor                                                                                                                                                                             | NA      |
| Role of sponsor or funder         | 5c      | Describe roles of funder(s), sponsor(s), and/or institution(s), if any, in developing the protocol                                                                                                                            | NA      |
| <b>INTRODUCTION</b>               |         |                                                                                                                                                                                                                               |         |
| Rationale                         | 6       | Describe the rationale for the review in the context of what is already known                                                                                                                                                 | 5       |
| Objectives                        | 7       | Provide an explicit statement of the question(s) the review will address with reference to participants, interventions, comparators, and outcomes (PICO)                                                                      | 6       |
| <b>METHODS</b>                    |         |                                                                                                                                                                                                                               |         |
| Eligibility criteria              | 8       | Specify the study characteristics (such as PICO, study design, setting, time frame) and report characteristics (such as years considered, language, publication status) to be used as criteria for eligibility for the review | 7-9, 11 |
| Information sources               | 9       | Describe all intended information sources (such as electronic databases, contact with study authors, trial registers or other grey literature sources) with planned dates of coverage                                         | 7,10    |

1  
2  
3  
4  
5  
6  
7  
8  
9  
10  
11  
12  
13  
14  
15  
16  
17  
18  
19  
20  
21  
22  
23  
24  
25  
26  
27  
28  
29  
30  
31  
32  
33  
34  
35  
36  
37  
38  
39  
40  
41  
42  
43  
44  
45  
46  
47  
48  
49

|                                    |     |                                                                                                                                                                                                                                                     |       |
|------------------------------------|-----|-----------------------------------------------------------------------------------------------------------------------------------------------------------------------------------------------------------------------------------------------------|-------|
| Search strategy                    | 10  | Present draft of search strategy to be used for at least one electronic database, including planned limits, such that it could be repeated                                                                                                          | 19-21 |
| Study records:                     |     |                                                                                                                                                                                                                                                     |       |
| Data management                    | 11a | Describe the mechanism(s) that will be used to manage records and data throughout the review                                                                                                                                                        | 9-12  |
| Selection process                  | 11b | State the process that will be used for selecting studies (such as two independent reviewers) through each phase of the review (that is, screening, eligibility and inclusion in meta-analysis)                                                     | 9-12  |
| Data collection process            | 11c | Describe planned method of extracting data from reports (such as piloting forms, done independently, in duplicate), any processes for obtaining and confirming data from investigators                                                              | 9-12  |
| Data items                         | 12  | List and define all variables for which data will be sought (such as PICO items, funding sources), any pre-planned data assumptions and simplifications                                                                                             | 9-12  |
| Outcomes and prioritization        | 13  | List and define all outcomes for which data will be sought, including prioritization of main and additional outcomes, with rationale                                                                                                                | 9     |
| Risk of bias in individual studies | 14  | Describe anticipated methods for assessing risk of bias of individual studies, including whether this will be done at the outcome or study level, or both; state how this information will be used in data synthesis                                | NA    |
| Data synthesis                     | 15a | Describe criteria under which study data will be quantitatively synthesised                                                                                                                                                                         | 13-14 |
|                                    | 15b | If data are appropriate for quantitative synthesis, describe planned summary measures, methods of handling data and methods of combining data from studies, including any planned exploration of consistency (such as I <sup>2</sup> , Kendall's τ) | 13-14 |
|                                    | 15c | Describe any proposed additional analyses (such as sensitivity or subgroup analyses, meta-regression)                                                                                                                                               | 13-14 |
|                                    | 15d | If quantitative synthesis is not appropriate, describe the type of summary planned                                                                                                                                                                  | NA    |
| Meta-bias(es)                      | 16  | Specify any planned assessment of meta-bias(es) (such as publication bias across studies, selective reporting within studies)                                                                                                                       | 13-14 |
| Confidence in cumulative evidence  | 17  | Describe how the strength of the body of evidence will be assessed (such as GRADE)                                                                                                                                                                  | NA    |

**\* It is strongly recommended that this checklist be read in conjunction with the PRISMA-P Explanation and Elaboration (cite when available) for important clarification on the items. Amendments to a review protocol should be tracked and dated. The copyright for PRISMA-P (including checklist) is held by the PRISMA-P Group and is distributed under a Creative Commons Attribution Licence 4.0.**

*From: Shamseer L, Moher D, Clarke M, Ghersi D, Liberati A, Petticrew M, Shekelle P, Stewart L, PRISMA-P Group. Preferred reporting items for systematic review and meta-analysis protocols (PRISMA-P) 2015: elaboration and explanation. BMJ. 2015 Jan 2;349(jan02 1):g7647.*
