# Supplementary material for: Dose–response relationship between cigarette smoking and site-specific cancer risk: protocol for a systematic review with an original design combining umbrella and traditional reviews
Source: PubMed Central journal article supplement — BMJ Open. 2017 Nov 1;7(10):e018930. doi: 10.1136/bmjopen-2017-018930 (PMC5695313; doi:10.1136/bmjopen-2017-018930), 2017-11-01
Supplement: bmjopen-2017-018930supp001.pdf [file bmjopen-2017-018930supp001.pdf]

**Appendix 1.** Literature search strings for the umbrella review used in various databases.

***MEDLINE***

(neoplasms [MeSH Terms] OR cancer [title] OR cancers [title] OR neoplasm [title] OR neoplasms [title] OR leukaemia [title] OR leukemia [title] OR leukaemias [title] OR leukemias [title] OR carcinoma[title] OR maligna\*[title]) AND (meta-analysis OR "meta analysis" OR pooled-analysis OR "pooled analysis" OR "systematic review"[tiab] OR "systematic revision"[tiab]) AND (cigarette [title] OR cigarettes [title] OR tobacco [title] OR smoking [title] OR smokers [title] OR smoking [MeSH Terms])

***Embase***

(cancer:ti OR cancers:ti OR neoplasm:ti OR neoplasms:ti OR leukaemia:ti OR leukemia:ti OR leukaemias:ti OR leukemias:ti OR carcinoma:ti OR maligna\*:ti) AND ('meta analysis' OR 'pooled analysis' OR 'meta analysis':it) AND (cigarette:ti OR cigarettes:ti OR tobacco:ti OR smoking:ti OR smokers:ti)

***ISI Web of Science***

TITLE: ((cancer OR cancers OR neoplasm OR neoplasms OR leukaemia OR leukemia OR leukaemias OR leukemias OR carcinoma OR maligna\*) AND (cigarette OR cigarettes OR tobacco OR smoking OR smokers)) AND TOPIC: ((meta-analysis OR "meta analysis" OR pooled-analysis OR "pooled analysis" OR "systematic review" OR "systematic revision")) NOT DOCUMENT  
TYPES: (Letter OR Meeting Abstract OR Meeting Summary)

***Cochrane Database of Systematic Reviews***

(cancer:ti or cancers:ti or neoplasm:ti or neoplasms:ti or leukaemia:ti or leukemia:ti or leukaemias:ti or leukemias:ti or carcinoma:ti or maligna\*:ti) and (meta-analysis or "meta analysis" or pooled-

analysis or "pooled analysis") and (cigarette:ti or cigarettes:ti or tobacco:ti or smoking:ti or smokers:ti)

**Appendix 2.** Literature search strings for the update of the available reviews used in various databases.

***MEDLINE***

(((((*cancer site*) AND (cancer OR neoplasm OR carcinoma OR Neoplasms [MeSH Terms]) AND (cigarette OR cigarettes OR tobacco OR smoking OR smokers OR smoking [MeSH Terms]))) AND English[Language]) AND ("*last review year*"[Date - Publication]: "2017"[Date - Publication])

***Embase***

cigarette:ti OR cigarettes:ti OR tobacco:ti OR smoking:ti OR smokers:ti AND (*cancer site*:ab,ti) AND (cancer:ab,ti OR neoplasm:ab,ti OR carcinoma:ab,ti) AND (article:it OR review:it) AND [english]/lim AND [*last review year-2017*]/py NOT [medline]/lim

*Cancer site* stands for the terms used to identify the site-specific cancer (e.g., for liver cancer, the combination of the following terms will be considered: liver, hepatocellular, hepatic).

*Last review year* refers to the year of publication of the most recent article included in the last comprehensive review.
